# Supplementary material for: In situnet fishing of α-glucosidase inhibitors from evening primrose (Oenothera biennis) defatted seeds by combination of LC-MS/MS, molecular networking, affinity-based ultrafiltration, and molecular docking
Source: Royal Society of Chemistry journal article supplement (doi:10.1039/d1fo03975j), 2022-01-01
Supplement: d1fo03975j1.pdf [file d1fo03975j1.pdf]

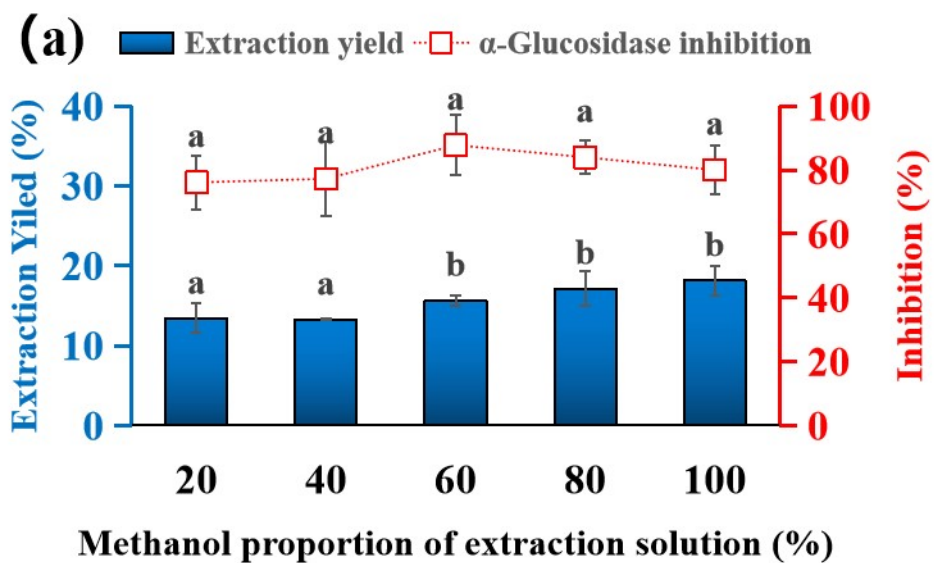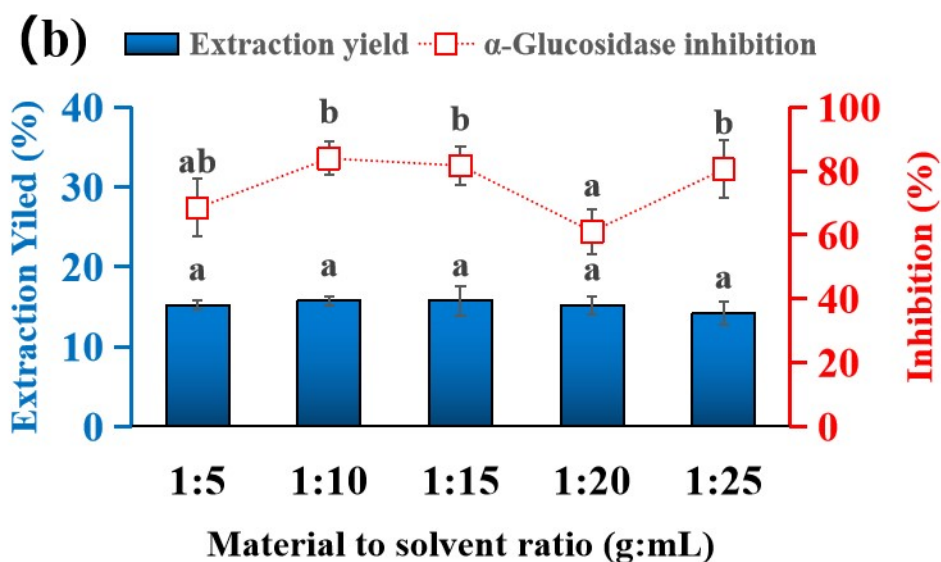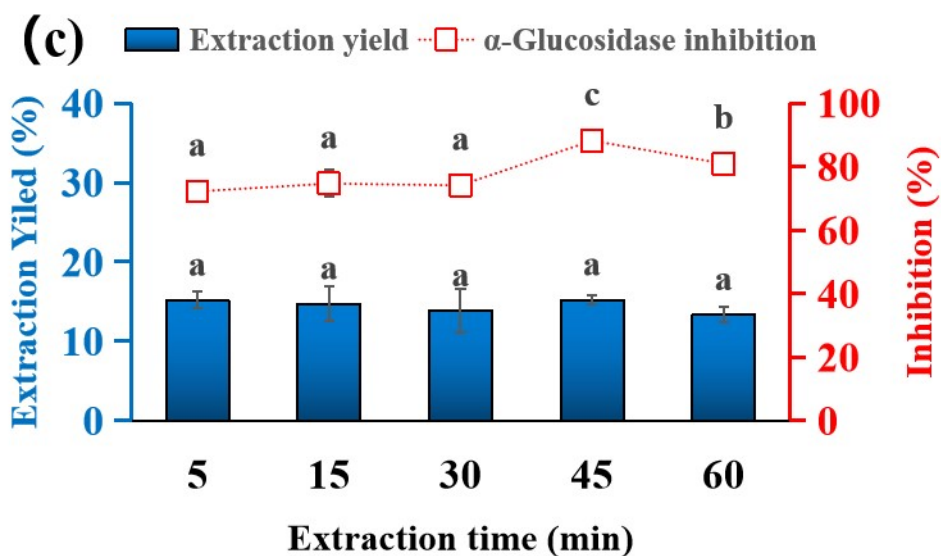

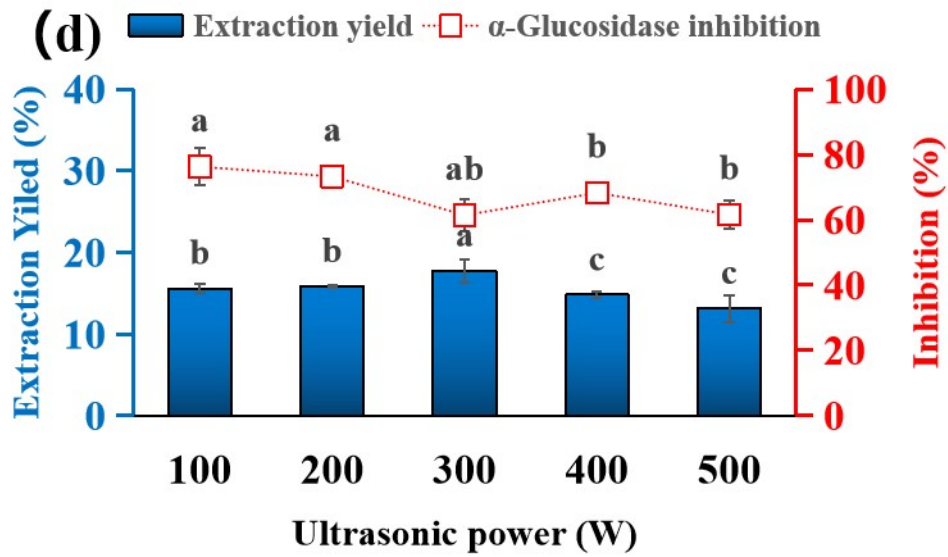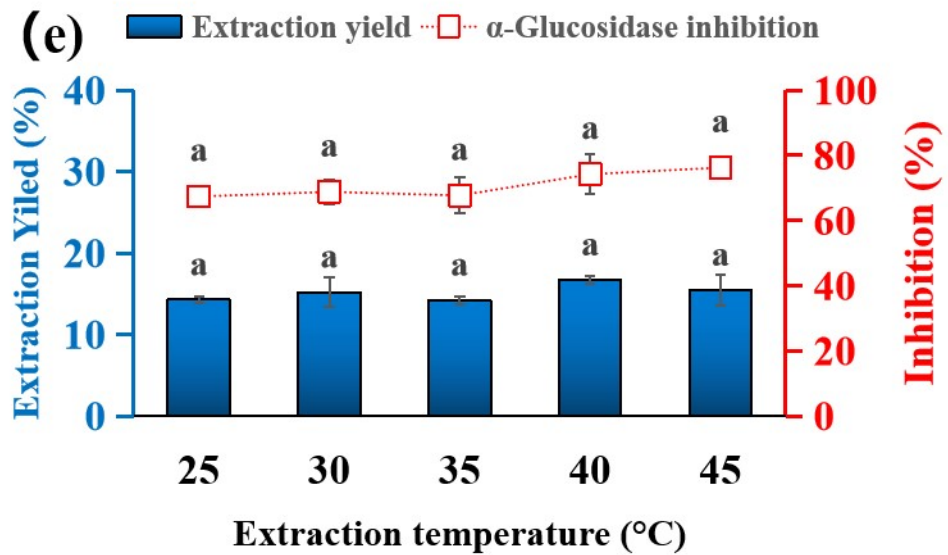

Figure S1. The effects of methanol proportion of extraction solution (a), material to solvent ratio (b), extraction time (c), ultrasonic power (d), and extraction temperature (e) on extraction yields and  $\alpha$ -glucosidase inhibitory activity. Data in the bar graph or line chart with different letters are significantly different from each other ( $p < 0.05$ ).
